# Supplementary material
Source: publisher figshare collection journal article supplement (https://karger.figshare.com/ndownloader/files/20135156)
Supplement: Supplementary file 1 [file 20135156]

**Supplementary Appendix**

Supplement to: Andrade, Juliana Gabriel Ribeiro de, et al**.Clinical findings and follow up of 46,XY and 45,X/46,XY testicular dysgenesis.**

This appendix has been provided by the authors to give readers additional information about their work.

**Table of Contents:**

1. Supplementary Figure S1. *Included cases in this study.*
2. Supplementary Table S1. *Clinical data of patients with mixed and 46,XY partial gonadal dysgenesis.*
3. Supplementary Table S2. *Comparison of basal FSH, LH and testosterone ranges in patients with mixed and 46,XY partial gonadal dysgenesis at minipuberty and after puberty.*
4. Supplementary Table S3. *Associated anomalies in patients with mixed and 46,XY partial gonadal dysgenesis.*
5. Supplementary Table S4. *Complete data of mixed gonadal dysgenesis patients.*
6. Supplementary Table S5. *Complete data of partial gonadal dysgenesis patients.*

**Supplementary Figure.**


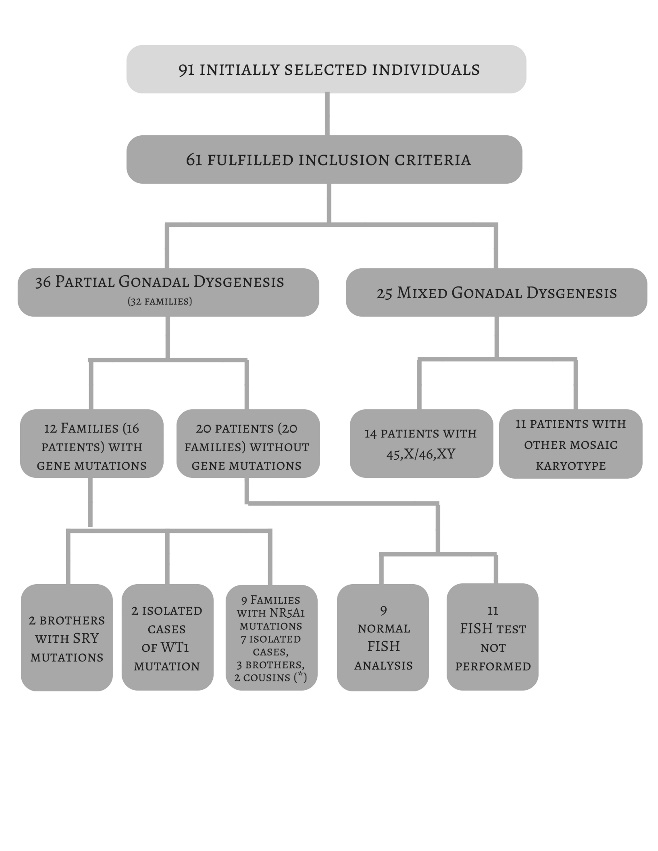


**Figure S1: Included cases in this study.** Diagram of the included cases in this study. The initial study was constituted from 91 patients. Sixty-one out of it with a previous diagnosis of testicular dysgenesis fulfilled the inclusion criteria; 25 had Mixed Gonadal Dysgenesis (MGD) and 36 had Partial Gonadal Dysgenesis (PGD); the latter included 29 isolated and seven familial cases: two families with two affected individuals each and one with three affected brothers (32 families in total).

**Supplementary Tables.**

**Table S1.** *Clinical data of patients with mixed and 46,XY partial gonadal dysgenesis.*

|  | **MGD** | **PGD** | **p-value** |
| --- | --- | --- | --- |
| Mean age at first visit (range) | 3.8 years (0.02 to 42) | 2.6 years (0.02 to 27) | 0.434 |
| Sex assignment at first visit  (M:F:NA) | 11:3:10 | 13:7:16 | 0.676 |
| Sex assignment at last visit (M:F) | 14:11 | 29:6 | **0.023** |
| Parental consanguinity | 1/23 | 1/31 | 1.00 |
| Birth weight (g)† | 2,717 | 3,304 | **<0.001** |
| Birth length (cm) † | 46.1 | 48.2 | **0.001** |
| Mean EMS (range) | 4.8 (1 to 8) | 5.48 (1.5 to 10) | 0.355 |
| Gonadal palpation | 11 BL, 8 UL, 6 NP | 18 BL, 10 UL, 8 NP | 0.895 |
| Gonadal location | 15 LSF, 15 IC, 20 NP | 27 LSF, 19 IC, 26 NP | 0.691 |
| Uterus | 14/24 | 8/35 | **0.005** |

†full-term gestations only.

BL= bilateral; F= female; IC= inguinal channel; LSF= labioscrotal fold; M= male; MGD= mixed gonadal dysgenesis; NA= not assigned; NP= nonpalpable; PGD= 46,XY partial gonadal dysgenesis; UL= unilateral. Groups were compared by Fisher exact test (2x2 table) or Chi-square test (3x2).

**Table S2.** Comparison of basal FSH, LH and testosterone ranges in patients with mixed and 46,XY partial gonadal dysgenesis at minipuberty and after puberty.

|  | **Minipuberty** | | | | | | | | | **Puberty** | | | | | | | | |
| --- | --- | --- | --- | --- | --- | --- | --- | --- | --- | --- | --- | --- | --- | --- | --- | --- | --- | --- |
| **Gonadal dysgenesis** | **FSH** | | | **LH** | | | **Testosterone** | | | **FSH** | | | **LH** | | | **Testosterone** | | |
| Nl | Elevated | Total | Nl | Elevated | Total | Nl | Low | Total | Nl | Elevated | Total | Nl | Elevated | Total | Nl | Low | Total |
| **Mixed** | 7 | 0 | 7 | 7 | 1 | 8 | 0 | 8 | 8 | 0 | 5 | 5 | 1 | 4 | 5 | 2 | 3 | 5 |
| **Partial** | 11 | 4 | 15 | 9 | 6 | 15 | 0 | 14 | 14 | 3 | 6 | 9 | 2 | 7 | 9 | 5 | 3 | 8 |
| **Total** | 18 | 4 | 22 | 16 | 7 | 23 | 0 | 22 | 22 | 3 | 11 | 14 | 3 | 11 | 14 | 7 | 6 | 13 |
| **p-value** | 0.131 | | | 0.172 | | | - | | | 0.231 | | | 0.725 | | | 0.413 | | |

FSH= follicle-stimulating hormone; LH= luteinizing hormone; Nl= normal. Groups were compared by Mann-Whitney test.

Table S3. Associated anomalies in patients with mixed and 46,XY partial gonadal dysgenesis.

|  | **MGD**† | **PGD**† | **p-value** |
| --- | --- | --- | --- |
| Dysmorphisms | 11/23 (48%) | 9/35 (26%) | 0.074 |
| Delayed neuromotor development/learning disability | 2/20 (10%) | 4/34 (12%) | 0.609 |
| Cardiovascular anomalies | 5/21 (23%) | 3/4† | - |
| renal/collecting system malformations | 3/22 (14%) | 6/33 (18%) | 0.478 |
| thyroid dysfunction | 7/23 (30%) | 2/23 (9%) | 0.067 |
| Hearing impairment | 2/18 (11%) | 5/6† | - |

†The numbers refer to abnormal tests/ total of patients in whom the screening was done.

MGD= mixed gonadal dysgenesis; PGD= 46,XY partial gonadal dysgenesis. Groups were compared by Fisher exact test.

**Table S4:** Complete data of mixed gonadal dysgenesis patients.

| **patient** | **karyotype** | **final sex assignment** | **ems** | **prader** | **uterus** | **gonadal location (r/l)** | **gonadal histology (r/l)** | **age at first / last ba (y)** | **total testosterone (ng/ml) at first / last ba** | **fsh (iu/l) at first / last ba** | **lh (iu/l) at first / last ba** | **age at last ce** | **final height (cm/sds)** | **turner stigmata (phenotype, cardiac, renal, hearing impariment, thyroid)** |
| --- | --- | --- | --- | --- | --- | --- | --- | --- | --- | --- | --- | --- | --- | --- |
| **M01** | 45,X/46,XY | M | 7 | 3 | Yes | NP / NP | NA / dysgenetic testis | 12 / 15 | 1.6 / 2.4 | 26 / 42.3 | 0.2 / 16.2 | 27 | 144 / -4.53 | P, R |
| **M02** | 45,X/  46,X,i(Y)q/  46,X,r(?Y)/  47,X,i(Yq)+r(?Y)/  47,XYY | M | 6 | 4 | Yes | IC / IC | Prepubertal testis with SCOS (bilaterally) | 0.1 / 16.1 | 2.8 / 2.25 | - / 43.9 | - / 15.83 | 16 | 153.4 / -2.69 | P |
| **M03** | 45,X/46,XY | F | 2 | 2 | No | LSF / NP | Prepubertal testis / dysgenetic gonad | - / 9 (**) | - / - | - / 2.5 (**) | - / 2 (**) | 22 | 148.6 / -2.28 | P, T |
| **M04** | 45,X/46,XY | F | 5 | 3 | Yes | IC / IC | Dysgenetic testis / dysgenetic gonad | 0.8 / 13.8 (**) | 0.2 / - | - / 45.3 (**) | - / 10.25(**) | 21 | 146 / -2.66 | P, C, O, T |
| **M05** | 45,X/46,XY | M | 8 | 4 | No | LSF / LSF | Dysgenetic testis bilaterally | 1.2 / 16.4 | 0.1 / 5.05 | 2.9 / 15.34 | 1.6 / 7.32 | 18 | 156 / -2.83 | P |
| **M06** | 45,X/46,XY | M | 4.5 | 4 | Yes | NP / IC | Dysgenetic gonad / dysgenetic testis | 3.1 / - | 0.2 / - | 0.46 / - | 0.1 / - | 4 | 103 / -1.21 | NA |
| **M07** | 45,X/46,X+mar (*) | F | 4 | 3 | Yes | NP / NP | Dysgenetic testis / prepubertal testis | 0.4 / 11.5(**) | 0.2 / - | - / 5.68(**) | 0.1 / 0.1(**) | 13 (†) | 133 / -3.61 (†) | P, T |
| **M08** | 45,X/46,XY | M | 5.5 | 3 | No | IC / LSF | Dysgenetic testis / prepubertal testis | 0.33 / - | 0.44 / - | 4.5 / - | 5.5 / - | 11 | 126.9 / -2.52 | P |
| **M09** | 45,X/46,XY | M | 6 | 4 | No | LSF / NP | Prepubertal testis / dysgenetic gonad | 0.1 / 10.25 | 0.02 / 0.02 | 1.05 / 2.19 | 0.1 / 0.2 | 11 | 128.7 / -2.25 | P |
| **M10** | 45,X/46,X+mar (*) | M | 6 | 4 | No | LSF / LSF | Prepubertal testis with a few signals of dysgenesia (bilaterally) | 0.1 / 9.6 | 1.95 / 0.03 | 11.2 / 2.45 | 11.7 / 0.25 | 9 | 126 / -1.77 | T |
| **M11** | 45,X/46,X+mar (*) | F | 5 | 4 | No | LSF / NP | Dysgenetic testis / dysgenetic gonad | 0.2 / - | 0.12 / - | 7.17 / - | 3.6 / - | 8 | 122.5 / -1.16 | No |
| **M12** | 45,X/46,XY | M | 4 | 3 | Yes | NP / NP | Dysgenetic testis bilaterally | 2.2 / - | 0.02 / - | 5.9 / - | 0.1 / - | 9 | 124 / -1.74 | R |
| **M13** | 45,X/46,XY | M | 5.5 | 4 | Yes | LSF / IC | Dysgenetic gonad / prepubertal testis | 0.2 / - | 1.23 / - | 2.7 / - | 5.3 / - | 4 | 96 / -2.31 | No |
| **M14** | 45,X/46,XY | M | 1.5 | 3 | No | NP / LSF | Mullerian and wolffian derivatives / prepubertal testis | 6 / 8 | - / - | 1.25 / 1.08 | 0.1 / 0.1 | 10 | 132.4 / -1.43 | T |
| **M15** | 45,X/46,XY | F | 5 | 3 | Yes | IC / IC | Prepubertal testis / dysgenetic testis | 0.1 / - | 2.49 / - | 6.9 / - | 15.8 / - | 6 | 112.5 / -1.56 | C, TP |
| **M16** | 45,X/46,X+mar (*) | F | 1 | 2 | No | NP / NP | Dysgenetic testis / NA | 41 / 42 | - / 0.29 | 21 / 28.7 | 5.2 / 8.85 | 42 | 139.7 / -3.62 | P |
| **M17** | 45,X/  46,XYq-/  46,X+mar | M | 6 | 4 | N.A. | LSF / NP | NA / mullerian and wolffian derivatives | 15 / 20 | 2.07 / 5.99 | 21.2 / 18.16 | 7.1 / 9.52 | 20 | 153 / -3.3 | P, C |
| **M18** | 45,X/46,X+mar (*) | M | 2 | 3 | Yes | LSF / NP | Normal testis / dysgenetic gonad | 17 (**) / 18(**) | 6.26 / - | 69.49 / 122.1 | 28.6 / 38.13 | 20 | 157 / -2.75 | No |
| **M19** | 45,X/  46,X,i(Y)(q10)/  47,X,i(y)(q10)x2 | F | 5 | 4 | Yes | LSF / NP | Dysgenetic testis / dysgenetic gonad | 0.1 / 0.2 | - / 0.02 | 10.4 / 108.4 | 6.1 / 40 | 3 | 96.2 / -0.74 | P |
| **M20** | 45,X/46,X,i(dic)Yq | F | 1 | 3 | Yes | NP / NP | Dysgenetic gonad / prepubertal testis | 0.1 / - | - / - | 7.8 / - | 5.5 / - | 2 | 89 / -0.88 | C, R |
| **M21** | 45,X/46,XY | M | 7.5 | 5 | No | NP / NP | Prepubertal testis / prepubertal testis | 1.2 / - | 0.02 / - | 0.8 / - | 0.5 / - | 4 | 93 / -2.48 | P, C, O, T |
| **M22** | 45,X/  46,X+mar/  47,X+mar+mar | F | 7.5 | 3 | Yes | LSF / IC | Dysgenetic testis bilaterally | 0.1 / 0.2 | 2.45 / 0.78 | 3.6 / 6.89 | 2.3 / 2.23 | 1 | 67.2 / -4.32 | No |
| **M23** | 45,X/46,XY | M | 5.5 | 4 | Yes | LSF / IC | Dysgenetic testis bilaterally | 0.1 / - | 1.42 / - | 2.1 / - | 2.3 / - | 1 | 80.2 / -0.39 | No |
| **M24** | 45,X/46,XY | F | 5 | 4 | Yes | IC / IC | Dysgenetic testis with gonadoblastoma / dysgenetic testis | 0.1 / - | 2.51 / - | 4.8 / - | 5.4 / - | 0 | 59.4 / -1.94 | No |
| **M25** | 45,X/  46,X+mar/  47,x+r+mar | F | 5 | 4 | Yes | IC / IC | Dysgenetic testis bilaterally | 0.2 / - | 0.44 / - | 3.1 / - | 2.6 / - | 1 | 74.1 / - | No |

(*) *SRY* positive.

(**) After gonadectomy.

(†) Use of hGH therapy.

CE = Clinical Evaluation; BA = biological assay; N.A. = not available; NP = non palpable; IC = inguinal channel; LSF = labioscrotal folds; P = phenotype (Turner stigmata); C= cardiac malformation; R = renal alterations; O = otitis and/or hearing impairment; T = Thyroid disease.

**Table S5: Complete data of partial gonadal dysgenesis patients.**

| **PATIENT** | **FISH analysis** | **Molecular analysis** | **final sex assignment** | **EMS** | **prader** | **uterus** | **gonadal location (R/L)** | **Gonadal histology (R/L)** | **Age at First / Last BA (y)** | **Total Testosterone (ng/ml) at First / Last BA** | **FSH (IU/L) at First / Last BA** | **LH (IU/L) at first / last BA** | **Age at Last CE** | **FINAL HEIGHT (CM/SDS)** |
| --- | --- | --- | --- | --- | --- | --- | --- | --- | --- | --- | --- | --- | --- | --- |
| **P01** |  | NR5A1 p.Ser32Asn | M | 9 | 3 | No | LSF / LSF | Dysgenetic testis bilaterally | 0.4 / 24.8 | 0.2 / 1.71 | - / 54.22 | - / 20.02 | 25 | 165.5 / -1.58 |
| **P02** | 46,XY |  | M | 5.5 | 4 | No | LSF / IC | N.A. / dysgenetic testis | 8 / 22.5 | 0.1 / 9.66 | 5.3 / 17.81 | 1.8 / 20.42 | 20 | 165.5 / -1.58 |
| **P03** |  |  | M | 5 | 4 | No | IC / IC | Dysgenetic testis bilaterally | 0.3 / 17 | 0.1 / 0.29 | 1.4 / 9.43 | 0.1 / 5.04 | 17 | 174 / -0.22 |
| **P04** |  |  | M | 1.5 | 3 | Yes | IC / NP | Dysgenetic testis / dysgenetic gonad | 7 / 17.8 | 0.1 / 2.78 | 3.9 / 84.46 | 1.1 / 22.3 | 18 | 171 / -0.76 |
| **P05** |  |  | M | 6 | 4 | No | LSF / LSF | Dysgenetic testis bilaterally | 5 / 17.4 | 0.1 / 6.33 | 0.9 / 12.28 | 0.1 / 5.79 | 18 | 175 / -0.21 |
| **P06** | 46,XY |  | M | 6 | 3 | No | LSF / LSF | Dysgenetic testis bilaterally | 0.6 / 19.5 | 0.1 / 5.43 | 3 /4.92 | 4.9 / 9.86 | 18 | 169.5 / - |
| **P07** |  |  | M | 6.5 | 4 | No | IC/ LSF | Dysgenetic testis bilaterally | 0.7 / 18.5 | 0.2 / 7.22 | 2.9 / 5.15 | 0.1 / 5.53 | 20 | 171.3 / -0.78 |
| **P08** | 46,XY |  | F | 4 | 2 | No | NP / NP | Dysgenetic testis / dysgenetic gonad | 0.5 / 18(*) | 0.1 / - | 6.6 / 93.1(*) | 2.3 / 48.7(*) | 19 | 175.2 / +1.84 |
| **P09** |  | NR5A1 p.Asp293Asn | F | 4 | 3 | Yes | NP / NP | Dysgenetic testis bilaterally | 20 / - | 4.42 / - | 36.3 / - | 17.7 / - | 18 | 160 / -0.49 |
| **P10** |  |  | M | 10 | 5 | No | IC / NP | Dysgenetic testis / vanishing gonad | 4.5 / 17.3 | 0.1 / 9.2 | 5.5 / 43.7 | 11.5 / 13.5 | 17 | 180.2 / +0.62 |
| **P11** | 46,XY |  | F | 4 | 3 | No | NP / NP | Dysgenetic testis / dysgenetic gonad | 0.2 / 11.2(*) | 0.2 / - | 24 / 117.12(*) | 10 / 35.3(*) | 18 | 173 / +1.52 |
| **P12** | 46,XY | WT1 p.Gln192Argfs*99 | M | 4.5 | 4 | No | NP / NP | Vanishing gonad / dysgenetic testis | 0.2 / 12 | - / - | 3.3 / 67.3 | 4.3 / 18.63 | 18 | 165.5 / -1.51 |
| **P13a** | 46,XY | NR5A1 p.Lys38* | M | 5.5 | 4 | Yes | IC / IC | Vanishing gonad / dysgenetic testis | 2 / 19.2 | 0.1 / 4.03 | 4.5 / 28.37 | 1 / 9.12 | 18 | 175 / -0.19 |
| **P13b** |  | Not available | M | 7.5 | 5 | No | LSF / NP | N.A. / vanishing gonad | 8 / - | 0.1 / - | 1.1 / - | 0.1 / - | 11 | 152 / +0.64 |
| **P14a** |  | SRY p.Arg30lle | M | 4.5 | 4 | Yes | IC / NP | Dysgenetic testis / dysgenetic gonad | 0.2 / 17.1 | 0.7 / 0.13 | 6.9 / 109.4 | 2.5 / 41.45 | 17 | 175 / -0.08 |
| **P14b** |  | SRY p.Arg30lle | M | 5 | 4 | Yes | LSF / NP | Prepubertal testis / dysgenetic gonad | 0.1 / 14.1 | 2.1 / 0.13 | 28.5 / 2.64 | 12.5 / 0.33 | 14 | 151.4 / -1.61 |
| **-P15** |  | NR5A1 p.Leu80Trpfs*8 | M | 4.5 | 3 | No | NP / NP | Dysgenetic testis / prepubertal testis | 0.9 / 17.7 | - / 3.73 | 13.8 / 59.5 | 6.7 / 27.39 | 18 | 161 / -2.10 |
| **P16** |  |  | M | 6 | 4 | No | LSF / LSF | N.A. | 0.5 / - | 0.1 / - | 8.1 / - | 9.6 / - | 0 | 62.9 / -5-3 |
| **P17** | 46,XY |  | M | 6 | 4 | No | LSF / LSF | Dysgenetic gonad / dysgenetic testis | 0.2 / 15.5 | 0.7 / 6.9 | 10.5 / 21.22 | 12.9 / 10.05 | 15 | 163.7 / -1.11 |
| **P18** |  | WT1 p.Asp469Asn | M | 3 | 4 | No | NP / NP | N.A. | 0.1 / 0.2 | 1.57 / 0.54 | 3.8 / 4.2 | 5.4 / 3.5 | 0 | 54 / +0.51 |
| **P19a** |  | NR5A1 p.Cys65Tyr | M | 6 | 3 | No | LSF / LSF | N.A. | 0.7 / 15.3 | 0.3 / 4.84 | 11.9 / 21.69 | 2.8 / 16.13 | 15 | 174.2 / +0.23 |
| **P19b** |  | NR5A1 p.Cys65Tyr | M | 6 | 4 | No | LSF / LSF | N.A. | 0.2 / 7.4 | 2.2 / 0.03 | 4.85 / 1.51 | 10 / 0.1 | 7 | 120 / -1.01 |
| **P19c** |  | NR5A1 p.Cys65Tyr | M | 5 | 3 | No | IC / IC | N.A. | 0.2 / 6.2 | 0.1 / 0.03 | 4.62 / 2.6 | 0.2 / 0.1 | 6 | 115 / -0.74 |
| **P20** |  |  | NA | 2 | 3 | N.A. | LSF / NP | N.A. | 0.6 / - | 0.1 / - | 24.5 / - | 5.6 / - | 0 | 59 / -4.0 |
| **P21** | 46,XY | NR5A1 c.1138+1G>T | F | 4 | 4 | No | NP / IC | Dysgenetic testis bilaterally | 1.2 / 12(*) | 0.21 / - | 12.6 / 53.65(*) | 1.3 / 18.6(*) | 15 | 170 / +1.2 |
| **P22** |  | NR5A1 p.Cys247* p.G146A | M | 5.5 | 4 | No | IC / LSF | N.A. | 21 / 23 | 4.5 / 15 | 45 / 35.64 | 8.5 / 11.85 | 20 | 175.8 / -0.15 |
| **P23** | 46,XY |  | M | 8 | 5 | No | IC / IC | Dysgenetic testis bilaterally | 0.2 / 11.1 | 0.67 / 0.09 | 21.4 / 130.9 | 0.12 / 31.3 | 11 | 147 / +0.34 |
| **P24** |  |  | F | 8 | 5 | No | IC / IC | Dysgenetic testis bilaterally | 17 / 17.3 | 0.4 / - | 83.7 / 95.58 | 22.2 / 33.68 | 22 | 169.5 / +0.95 |
| **P25** |  |  | F | 7 | 5 | No | NP / NP | N.A. | 0.1 / 0.6 | 0.04 / 0.07 | 26.7 / 54.7 | 2.2 / 4.22 | 0 | 68.5 / +0.3 |
| **P26** | 46,XY |  | M | 4.5 | 3 | No | IC / NP | Prepubertal testis / dysgenetic testis | 0.1 / 7 | 0.59 / 0.01 | 12.07 / 3.42 | 12.37 / 0.07 | 7 | 123 / -0.38 |
| **P27** |  | NR5A1  c.-133G>A | M | 6 | 4 | No | LSF / LSF | N.A. | 0.1 / 6.2 | - / 0.12 | 12 / 1.99 | 7.18 / 0.1 | 6 | 121.2 / +0.66 |
| **P28** | 46,XY |  | M | 5 | 3 | Yes | LSF / NP | Prepubertal testis / dysgenetic gonad | 0.6 / 6.5 | 0.1 / - | 2.6 / 1.5 | 0.7 / 0.07 | 7 | 125.5 / +0.44 |
| **P29** |  |  | M | 4 | 4 | Yes | NP / NP | Dysgenetic gonad / dysgenetic testis | 3 / - | 0.1 / - | 4.8 / - | 0.2 / - | 2 | 94.1 / +0.55 |
| **P30** | 46,XY |  | M | 7.5 | 4 | No | LSF / IC | N.A. / prepubertal testis | 10 / 13 | 0.1 / 3.89 | 12.79 / 26.58 | 1.66 / 7.31 | 13 | 164 / +0.71 |
| **P31** | 46,XY |  | M | 5 | 4 | Yes | LSF / NP | Dysgenetic testis / vanishing gonads | 1.6 / - | 0.1 / - | 0.69 / - | 0.1 / - | N.A | N.A |
| **P32** |  | NR5A1 p.Lys396Argfs*34 | M | 6 | 3 | No | LSF / LSF | Dysgenetic testis bilaterally | 7.7 / - | 0.1 / - | 0.39 / - | 0.1 / - | 8 | 123 / -1.14 |

(*) After gonadectomy.

(†) Use of hGH therapy.

CE = Clinical Evaluation; BA = biological assay; N.A. = not available; NP = non palpable; IC = inguinal channel; LSF = labioscrotal folds; P = phenotype (Turner stigmata); C= cardiac malformation; R = renal alterations; O = otitis and/or hearing impairment; T = Thyroid disease.
